# Supplementary material for: 1-Alkyl-3-methylimidazolium alkanesulfonate ionic liquids, [CnH2n+1mim][CkH2k+1SO3]: synthesis and physicochemical properties
Source: Royal Society of Chemistry journal article supplement (doi:10.1039/b910177m), 2009-01-01
Supplement: b910177m.pdf [file b910177m.pdf]

# 1-Alkyl-3-methylimidazolium alkanesulfonate ionic liquids, [C<sub>n</sub>H<sub>2n+1</sub>mim][C<sub>k</sub>H<sub>2k+1</sub>SO<sub>3</sub>]: synthesis and physicochemical properties

Marijana Blesic,<sup>a,b</sup> Malgorzata Swadzba-Kwasny,<sup>a</sup> Tayeb Belhocine,<sup>a</sup> H.Q. Nimal Gunaratne,<sup>a</sup> José N. Canongia Lopes,<sup>b,d</sup> Margarida F. Costa Gomes,<sup>c</sup> Agílio A. H. Pádua,<sup>c</sup> Kenneth R. Seddon<sup>a,b</sup> and Luís Paulo N. Rebelo,<sup>\*b</sup>

5

## ELECTRONIC SUPPORTING INFORMATION

10

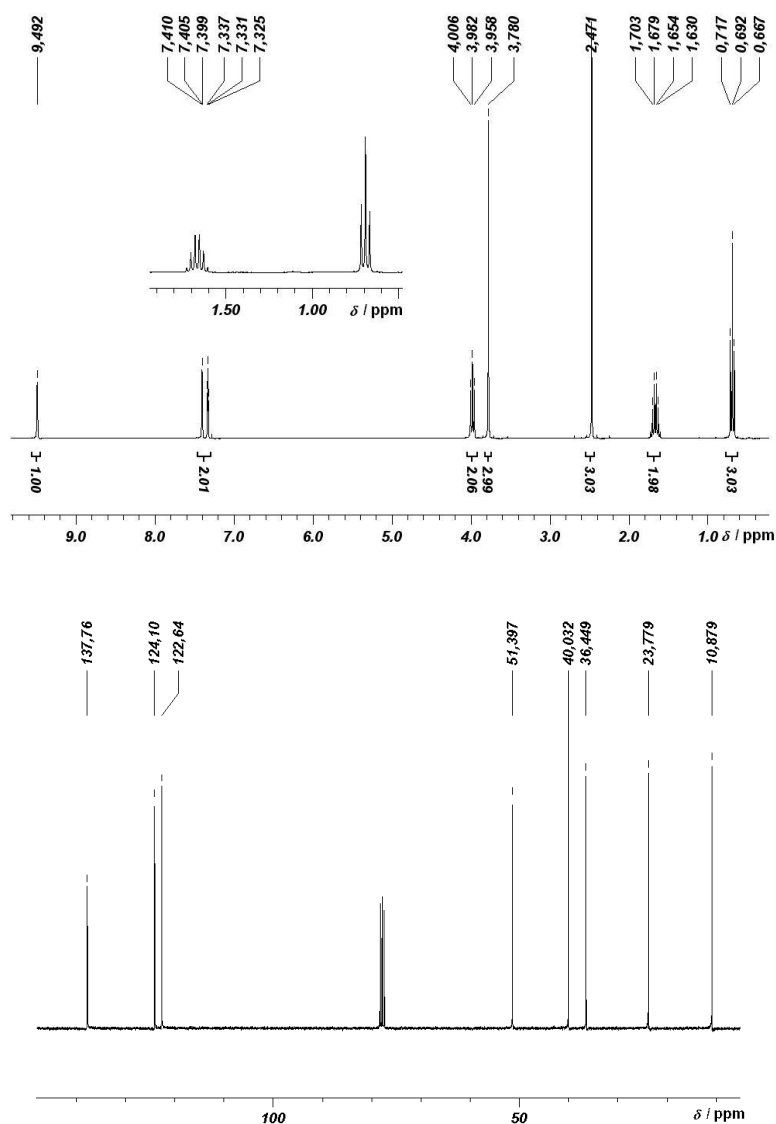

15

**Figure 1S.** Typical examples of the NMR spectra of [C<sub>n</sub>mim][C<sub>k</sub>SO<sub>3</sub>] ionic liquids; the <sup>1</sup>H NMR spectrum (300 MHz, 27 °C, CDCl<sub>3</sub>), top, and the <sup>13</sup>C{<sup>1</sup>H} NMR spectrum (75 MHz, 27 °C, CDCl<sub>3</sub>), bottom, of [C<sub>3</sub>mim][SO<sub>3</sub>CH<sub>3</sub>]

20

**Table 1S** <sup>1</sup>H NMR signals obtained for [C<sub>n</sub>mim][C<sub>k</sub>SO<sub>3</sub>] ionic liquids (300 MHz, 27 °C, CDCl<sub>3</sub>). In the case of ionic liquids with (n=1,k=1), (n=1,k=4) and (n=4,k=2) the data are comparable with the values reported in the ESI of ref. 5 of the present manuscript.

| <i>k</i> | <i>n</i> | H(2)         | H(5)                 | H(4)                 | NCH <sub>2</sub>     | NCH <sub>3</sub>     | SCH <sub>2</sub>     | SCH <sub>2</sub> CH <sub>2</sub> | S(CH <sub>2</sub> ) <sub>2</sub><br>CH <sub>2</sub> | S(CH <sub>2</sub> ) <sub>3</sub><br>(CH <sub>2</sub> ) <sub>k-3</sub> | S(CH <sub>2</sub> ) <sub>k-1</sub><br>CH <sub>3</sub> | NCH <sub>2</sub> CH <sub>2</sub> | N(CH <sub>2</sub> ) <sub>2</sub><br>(CH <sub>2</sub> ) <sub>n-3</sub> CH <sub>3</sub> | (CH <sub>2</sub> ) <sub>n-1</sub><br>CH <sub>3</sub> |                      |
|----------|----------|--------------|----------------------|----------------------|----------------------|----------------------|----------------------|----------------------------------|-----------------------------------------------------|-----------------------------------------------------------------------|-------------------------------------------------------|----------------------------------|---------------------------------------------------------------------------------------|------------------------------------------------------|----------------------|
| 1        | 1        | 9.70, s, 1H  | 7.61, s, 1H          | 7.61, s, 1H          |                      | 4.03, s, 1H          |                      |                                  |                                                     |                                                                       | 2.75, s, 3H                                           |                                  |                                                                                       | 4.03, s, 3H                                          |                      |
|          | 2        | 9.13, s, 1H  | 7.19, s, 1H          | 7.16, s, 1H          | 3.80, q, J = 7.5, 2H | 3.50, s, 3H          |                      |                                  |                                                     |                                                                       | 2.15, s, 3H                                           |                                  |                                                                                       | 1.0, t, J = 7.5, 3H                                  |                      |
|          | 3        | 9.49, s, 1H  | 7.41, d, J = 1.8, 1H | 7.33, d, J = 1.8, 1H | 3.98, t, J = 7.2, 2H | 3.70, s, 3H          |                      |                                  |                                                     |                                                                       | 2.47, s, 3H                                           | 1.63-1.71, m, J = 7.5, 2H        |                                                                                       | 0.69, t, J = 7.5, 3H                                 |                      |
|          | 4        | 9.81, s, 1H  | 7.66, s, 1H          | 7.55 (s), 1H         | 4.28, t, J = 7.2, 2H | 4.06, s, 3H          |                      |                                  |                                                     |                                                                       | 2.47, s, 3H                                           | 1.84-1.94, m, J = 7.5, 2H        | 1.31-1.41, m, J = 7.5, 2H                                                             | 0.99, t, J = 7.5, 3H                                 |                      |
|          | 5        | 9.81, s, 1H  | 7.66, d, J = 1.8, 1H | 7.52, d, J = 1.8, 1H | 4.27, t, J = 7.2, 2H | 4.06, s, 3H          |                      |                                  |                                                     |                                                                       | 2.76, s, 3H                                           | 1.85-1.95, m, J = 7.5, 2H        | 1.28-1.40, m, J = 7.5, 4H                                                             | 0.89, t, J = 6.8, 3H                                 |                      |
|          | 6        | 9.25, s, 1H  | 7.29, d, J = 1.5, 1H | 7.18, d, J = 1.5, 1H | 3.81, t, J = 6.3, 2H | 3.61, s, 3H          |                      |                                  |                                                     |                                                                       | 2.76, s, 3H                                           | 1.32-1.53, m, J = 7.5, 2H        | 0.80-1.0, m, J = 7.5, 6H                                                              | 0.41, t, J = 6.8, 3H                                 |                      |
|          | 8        | 9.48, s, 1H  | 7.41, J = 1.5, 1H    | 7.27, d, J = 1.5, 1H | 3.98, t, J = 6.9, 2H | 3.70, s, 3H          |                      |                                  |                                                     |                                                                       | 2.46, s, 3H                                           | 1.53-1.63, m, J = 7.5, 2H        | 0.91-1.05, m, J = 7.5, 10H                                                            | 0.56, t, J = 6.8, 3H                                 |                      |
|          | 10       | 9.68, s, 1H  | 7.61, s, 1H          | 7.45, s, 1H          | 4.18, t, J = 7.5, 2H | 3.97, s, 3H          |                      |                                  |                                                     |                                                                       | 2.67, s, 3H                                           | 1.72-1.84, m, J = 6.6, 2H        | 0.90-1.18, m, J = 7.5, 14H                                                            | 0.79, t, J = 6.6, 3H                                 |                      |
|          | 2        | 2            | 9.48, s, 1H          | 7.35, s, 1H          | 7.34, s, 1H          | 4.02, t, J = 7.5, 2H | 3.72, s, 3H          | 2.50, q, J = 7.5, 2H             |                                                     |                                                                       |                                                       | 1.32, s, 3H                      |                                                                                       |                                                      | 0.99, t, J = 7.5, 3H |
|          |          | 3            | 9.85, s, 1H          | 7.69, d, J = 6.6, 1H | 7.60, d, J = 6.6, 1H | 4.26, t, J = 7.2, 2H | 4.06, s, 3H          | 2.85, q, J = 7.5, 2H             |                                                     |                                                                       |                                                       | 1.34, t, J = 7.5, 3H             | 1.90-2.05, m, J = 7.5, 2H                                                             |                                                      | 0.97, t, J = 7.5, 3H |
| 4        |          | 10.06, s, 1H | 7.39, d, J = 1.8, 1H | 7.28, d, J = 1.8, 1H | 4.28, t, J = 7.5, 2H | 4.06, s, 3H          | 2.89, q, J = 7.5, 2H |                                  |                                                     |                                                                       | 1.26-1.33, m, J = 7.5, 3H                             | 1.88, m, J = 7.5, 2H             | 1.26-1.33, m, J = 7.5, 2H                                                             | 0.96, t, J = 7.2, 3H                                 |                      |
| 5        |          | 10.02, s, 1H | 7.44, d, J = 1.8, 1H | 7.32, d, J = 1.8, 1H | 4.26, t, J = 7.5, 2H | 4.06, s, 3H          | 2.88, q, J = 7.5, 2H |                                  |                                                     |                                                                       | 1.28-1.37, m, J = 7.5, 3H                             | 1.89, m, J = 7.5, 2H             | 1.28-1.37, m, J = 7.5, 4H                                                             | 0.90, t, J = 6.9, 3H                                 |                      |
| 6        |          | 9.50, s, 1H  | 7.42, d, J = 1.8, 1H | 7.27, d, J = 1.8, 1H | 3.96, t, J = 7.5, 2H | 3.74, s, 3H          | 2.50, q, J = 7.5, 2H |                                  |                                                     |                                                                       | 0.95-1.07, m, J = 7.5, 3H                             | 1.57, m, J = 7.5, 2H             | 0.95-1.07, m, J = 7.5, 6H                                                             | 0.55, t, J = 6.9, 3H                                 |                      |
| 3        |          | 2            | 9.85, s, 1H          | 7.64, d, J = 1.8, 1H | 7.62, d, J = 1.8, 1H | 4.35, t, J = 7.5, 2H | 4.05, s, 3H          | 2.80, q, J = 3.3, 2H             | 1.85, m, J = 7.5, 3H                                |                                                                       |                                                       | 1.57, t, J = 7.5, 3H             |                                                                                       |                                                      | 1.01, t, J = 7.5, 3H |
|          | 3        | 9.32, s, 1H  | 7.31, d, J = 1.5, 1H | 7.25, d, J = 1.8, 1H | 3.84, t, J = 7.5, 2H | 3.63, s, 3H          | 2.35, t, J = 6.0, 2H | 1.36-1.54, m, J = 7.2, 2H        |                                                     |                                                                       | 0.50-0.60, m, J = 7.2, 3H                             | 1.36-1.54, m, J = 7.2, 2H        |                                                                                       | 0.50-0.60, m, J = 7.2, 3H                            |                      |
| 4        | 2        | 9.86, s, 1H  | 7.63, d, J = 1.5, 1H | 7.61, d, J = 1.5, 1H | 4.36, q, J = 7.5, 2H | 4.05, s, 3H          | 2.80, t, J = 1.8, 2H | 1.81, q, J = 1.5, 2H             |                                                     |                                                                       | 1.37-1.49, m, J = 7.5, 2H                             | 0.91, t, J = 7.2, 3H             |                                                                                       | 1.57, t, J = 6.8, 3H                                 |                      |
|          | 3        | 9.87, s, 1H  | 7.65, d, J = 1.5, 1H | 7.55, d, J = 1.5, 1H | 4.25, t, J = 7.2, 2H | 4.05, s, 3H          | 2.83, t, J = 6.5, 2H | 1.76-1.84, m, J = 7.5, 2H        |                                                     |                                                                       | 1.36-1.49, m, J = 7.5, 2H                             | 0.89-0.99, m, J = 7.5, 3H        | 1.76-1.84, m, J = 7.5, 2H                                                             | 0.89-0.99, m, J = 7.5, 3H                            |                      |
| 6        | 2        | 9.55, s, 1H  | 7.39, s, 1H          | 7.34, s, 1H          | 4.03, t, J = 7.2, 2H | 3.76, s, 3H          | 2.48, t, J = 7.8, 2H | 1.43-1.51, m, J = 7.5, 2H        | 1.02-1.09, m, J = 7.2, 2H                           | 0.94-0.97, m, J = 7.2, 4H                                             | 0.54, t, J = 6.6, 3H                                  |                                  |                                                                                       | 1.24, m, J = 7.5, 3H                                 |                      |

**Table 2S**  $^{13}\text{C}\{^1\text{H}\}$  NMR signals obtained for  $[\text{C}_n\text{mim}][\text{C}_k\text{SO}_3]$  ionic liquids (75 MHz, 27 °C,  $\text{CDCl}_3$ ). In the case of ionic liquids with (n=1, k=1), (n=1, k=4) and (n=4, k=2) the data are comparable with the values reported in the ESI of ref. 5 of the present manuscript.

| <i>k</i>  | <i>n</i> | C2     | C5     | C4     | NCH <sub>2</sub> | NCH <sub>3</sub> | SCH <sub>2</sub> | SCH <sub>2</sub> CH <sub>2</sub> | S(CH <sub>2</sub> ) <sub>2</sub><br>CH <sub>2</sub> | S(CH <sub>2</sub> ) <sub>3</sub><br>(CH <sub>2</sub> ) <sub>k-3</sub> | S(CH <sub>2</sub> ) <sub>k</sub><br>CH <sub>3</sub> | NCH <sub>2</sub> CH <sub>2</sub> | N(CH <sub>2</sub> ) <sub>2</sub><br>(CH <sub>2</sub> ) <sub>n-3</sub><br>CH <sub>3</sub> | (CH <sub>2</sub> ) <sub>n-1</sub><br>CH <sub>3</sub> |
|-----------|----------|--------|--------|--------|------------------|------------------|------------------|----------------------------------|-----------------------------------------------------|-----------------------------------------------------------------------|-----------------------------------------------------|----------------------------------|------------------------------------------------------------------------------------------|------------------------------------------------------|
| <b>1</b>  |          | 138.89 | 124.0  | 124.0  |                  | 40.13            |                  |                                  |                                                     |                                                                       | 36.50                                               |                                  |                                                                                          | 40.13                                                |
| <b>2</b>  |          | 131.81 | 124.03 | 122.12 | 44.39            | 44.13            |                  |                                  |                                                     |                                                                       | 36.01                                               |                                  |                                                                                          | 10.01                                                |
| <b>3</b>  |          | 137.76 | 124.10 | 122.64 | 51.40            | 40.03            |                  |                                  |                                                     |                                                                       | 36.45                                               | 23.78                            |                                                                                          | 10.88                                                |
| <b>4</b>  |          | 137.88 | 124.17 | 122.56 | 49.80            | 40.05            |                  |                                  |                                                     |                                                                       | 36.51                                               | 32.35                            | 19.63                                                                                    | 13.65                                                |
| <b>5</b>  |          | 137.98 | 124.20 | 122.49 | 50.11            | 40.08            |                  |                                  |                                                     |                                                                       | 36.57                                               | 30.19                            | 28.49<br>22.29                                                                           | 14.09                                                |
| <b>6</b>  |          | 137.39 | 124.01 | 122.48 | 49.71            | 39.84            |                  |                                  |                                                     |                                                                       | 36.19                                               | 31.02                            | 30.19<br>25.77<br>22.31                                                                  | 13.92                                                |
| <b>1</b>  |          |        |        |        |                  |                  |                  |                                  |                                                     |                                                                       |                                                     |                                  | 30.47<br>29.15                                                                           |                                                      |
| <b>8</b>  |          | 137.74 | 124.18 | 122.67 | 49.99            | 39.98            |                  |                                  |                                                     |                                                                       | 36.42                                               | 31.79                            | 29.08<br>26.36<br>22.69                                                                  | 14.21                                                |
| <b>10</b> |          | 137.80 | 124.22 | 122.48 | 50.05            | 40.00            |                  |                                  |                                                     |                                                                       | 36.40                                               | 31.99                            | 29.63<br>29.56<br>29.40<br>29.19<br>26.43<br>22.81                                       | 14.29                                                |
| <b>2</b>  |          | 137.35 | 124.02 | 122.35 | 45.99            | 45.01            | 36.30            |                                  |                                                     |                                                                       | 15.75                                               |                                  |                                                                                          | 10.06                                                |
| <b>3</b>  |          | 137.94 | 124.16 | 122.63 | 51.44            | 46.15            | 36.50            |                                  |                                                     |                                                                       | 10.92                                               | 23.85                            |                                                                                          | 10.19                                                |
| <b>4</b>  |          | 139.11 | 123.66 | 121.96 | 51.19            | 46.27            | 36.89            |                                  |                                                     |                                                                       | 13.82                                               | 32.52                            | 19.87                                                                                    | 10.32                                                |
| <b>2</b>  | <b>5</b> | 137.52 | 123.98 | 122.59 | 50.06            | 46.20            | 36.42            |                                  |                                                     |                                                                       | 14.02                                               | 31.88                            | 29.89<br>25.62                                                                           | 10.19                                                |
| <b>6</b>  |          | 137.80 | 124.18 | 122.48 | 49.94            | 46.06            | 36.39            |                                  |                                                     |                                                                       | 14.06                                               | 31.21                            | 30.38<br>29.97<br>22.49                                                                  | 10.11                                                |
| <b>3</b>  | <b>2</b> | 137.71 | 124.12 | 122.36 | 54.36            | 42.22            | 36.50            | 19.19                            |                                                     |                                                                       | 15.88                                               |                                  |                                                                                          | 13.80                                                |
| <b>3</b>  | <b>3</b> | 137.55 | 124.03 | 122.61 | 54.15            | 51.16            | 36.27            | 18.96                            |                                                     |                                                                       | 13.66                                               | 23.67                            |                                                                                          | 10.71                                                |
| <b>4</b>  | <b>2</b> | 138.45 | 123.13 | 121.40 | 51.15            | 44.16            | 35.46            | 26.71                            | 21.28                                               |                                                                       | 14.87                                               |                                  |                                                                                          | 13.08                                                |
| <b>4</b>  | <b>3</b> | 138.16 | 124.16 | 122.60 | 52.27            | 51.53            | 36.59            | 27.83                            | 22.42                                               |                                                                       | 14.16                                               | 23.91                            |                                                                                          | 10.98                                                |
| <b>6</b>  | <b>2</b> | 137.48 | 124.05 | 122.34 | 52.43            | 45.08            | 36.38            | 31.72                            | 28.75                                               | 25.58<br>22.58                                                        | 15.81                                               |                                  |                                                                                          | 14.18                                                |
